# Supplementary material
Source: PubMed Central journal article supplement (PMC2972947)
Supplement: 0909335107_st01.pdf [file 0909335107_st01.pdf]

**Table S1: Spatial zoning within the Great Barrier Reef Marine Park**

| GBRMPA Zone /<br>(Terminology for this<br>paper) | Activities                                                                                          | % area<br>2004 | %<br>Previous |
|--------------------------------------------------|-----------------------------------------------------------------------------------------------------|----------------|---------------|
| General Use<br><b>(Open / Fished)</b>            | All reasonable uses: trawling and large mesh gill netting allowed.                                  | 33.8%          | 77.9%         |
| Habitat Protection<br><b>(Open / fished)</b>     | <b>Trawling prohibited</b> , large mesh gill netting allowed.                                       | 28.2%          | 15.2%         |
| Conservation Park                                | Gill netting and trawling prohibited; limited fishing and collecting allowed.                       | 1.5%           | 0.6%          |
| Buffer                                           | Fishing limited to trolling for pelagic fish only.                                                  | 2.9%           | 0.1%          |
| Scientific Research                              | Extractive use prohibited without the GBRMPA's permission except some types of Scientific Research. | 0.05%          | 0.01%         |
| Marine National Park<br><b>(No-take)</b>         | Extractive use prohibited without the GBRMPA's permission.                                          | 33.3%          | 4.6%          |
| Preservation<br><b>(No-entry)</b>                | Access prohibited without the GBRMPA's permission.                                                  | 0.2%           | 0.1%          |
| Commonwealth Islands                             | Extractive use prohibited without the GBRMPA's permission in waters surrounding the islands.        |                |               |

Consistent colour-coding is used throughout GBRMPA publications and maps to indicate different zones.

Further detail available at: [www.gbrmpa.gov.au/corp\\_site/management/zoning](http://www.gbrmpa.gov.au/corp_site/management/zoning)
