# Supplementary material
Source: PubMed Central journal article supplement (PMC2972947)
Supplement: 0909335107_st02.pdf [file 0909335107_st02.pdf]

**Table S2: Chronology of zoning and related monitoring on the Great Barrier Reef**

| Date              | Implementation                                                                    | Monitoring                                                                                                   |
|-------------------|-----------------------------------------------------------------------------------|--------------------------------------------------------------------------------------------------------------|
| 1975              | Great Barrier Reef Marine Park and GBR Marine Park Authority created;             | Australian Institute of Marine Science (AIMS) created;                                                       |
| 1981-1992         | Implementation of initial zoning schemes;                                         | A range of surveys of biodiversity distributions, especially corals and fish;                                |
| 1980s, 1990s      |                                                                                   | A range of surveys of biodiversity distributions, especially corals and fish;                                |
| 1986              |                                                                                   | Crown-of-thorns starfish surveys begun (AIMS);                                                               |
| 1993              |                                                                                   | AIMS GBR Long Term Monitoring Program begun;                                                                 |
| 1990s-early 2000s |                                                                                   | Effects of trawling study (53);<br>Effects of line fishing study (4);<br>Monitoring of inshore fish (23-25); |
| 1998              | Representative Areas Program for new zoning commenced;                            |                                                                                                              |
| 2003-2006         |                                                                                   | GBR Seabed Biodiversity surveys (51);                                                                        |
| 2004              | New Zoning Plan implemented;<br>Education and surveillance/ enforcement programs; | Initial monitoring;                                                                                          |
| 2006-2008         |                                                                                   | Post-zoning monitoring (e.g. 69);                                                                            |
| 2009              | GBR Outlook Report 2009 submitted to Parliament (1).                              |                                                                                                              |
